# Supplementary material for: Combined genetic and epigenetic interferences with interferon signaling expose prostate cancer cells to viral infection
Source: PubMed Central journal article supplement (PMC5239539; doi:10.18632/oncotarget.10313), 2016-06-28
Supplement: oncotarget-07-52115-s001.pdf [file oncotarget-07-52115-s001.pdf]

## Combined genetic and epigenetic interferences with interferon signaling expose prostate cancer cells to viral infection

### SUPPLEMENTARY INFORMATION

**Supplementary Movies S1 to S8: Live cell microscopy (fluorescence microscopy superimposed on phase contrast microscopy) of hMPV-GFP infection of LNCaP cells under different conditions of EpM and/or IFN $\alpha$  treatments.** All timelapse sequences were acquired under identical conditions (same exposures in bright-field and GFP channels; frequency 1 frame per 10 min). Movies are numbered: S1, untreated infected; S2, IFN $\alpha$  treated; S3, RG108; S4, RG108 + IFN $\alpha$ ; S5, 5AC; S6, 5AC + IFN $\alpha$ ; S7, TSA; S8, TSA + IFN $\alpha$ .

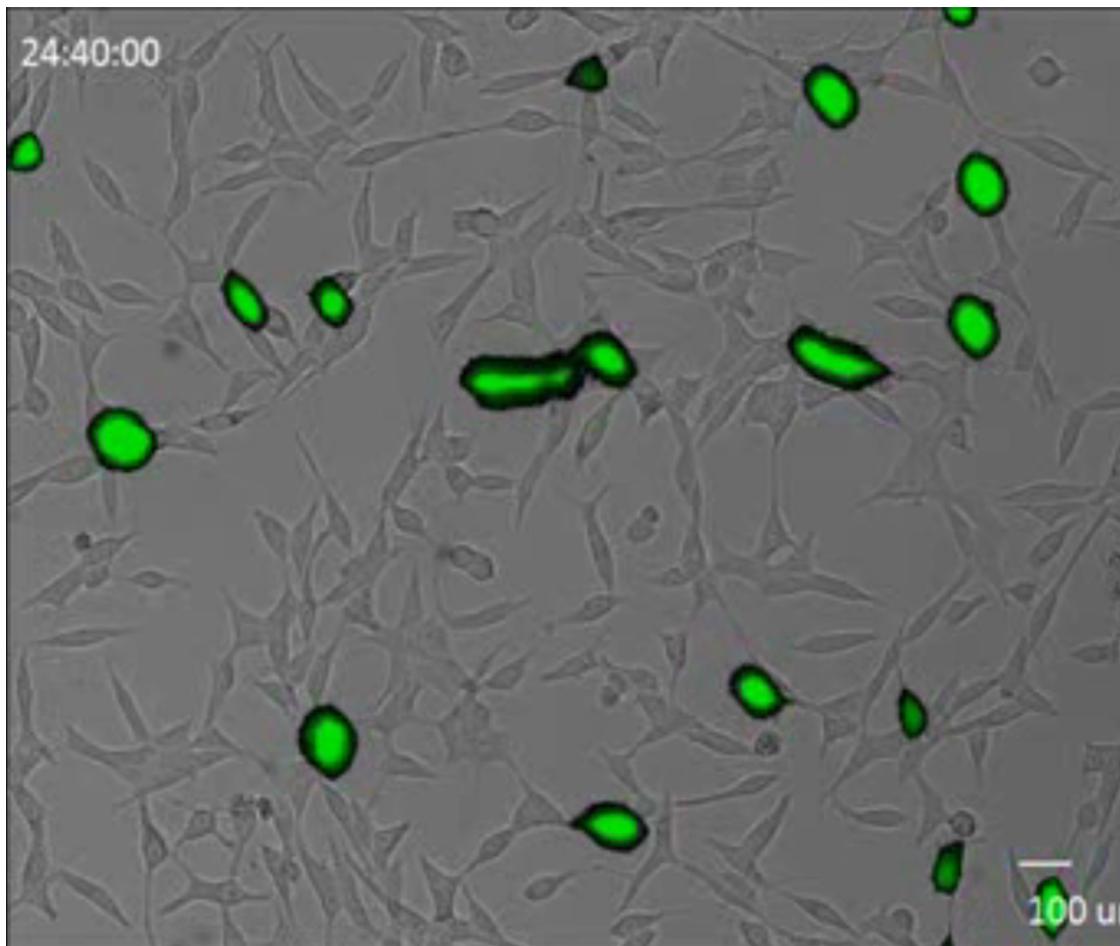

See Supplementary File 1

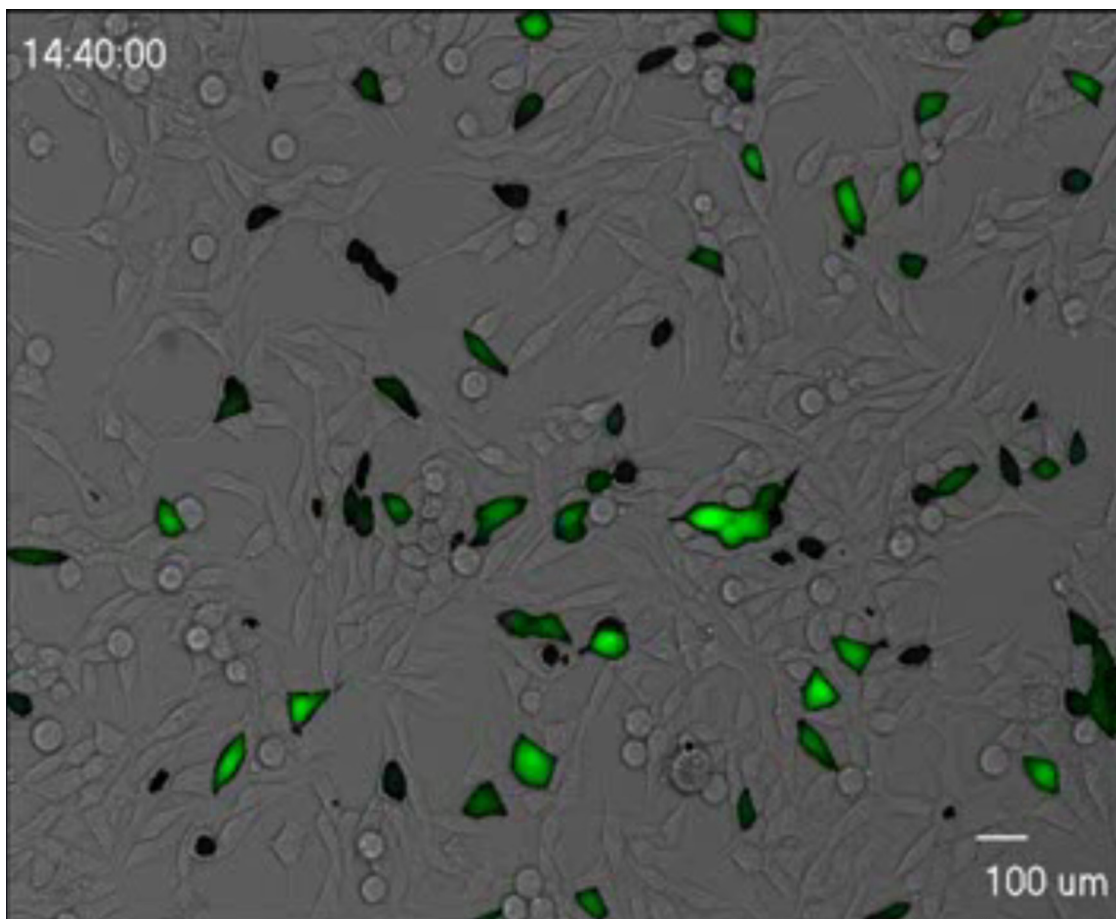

See Supplementary File 2

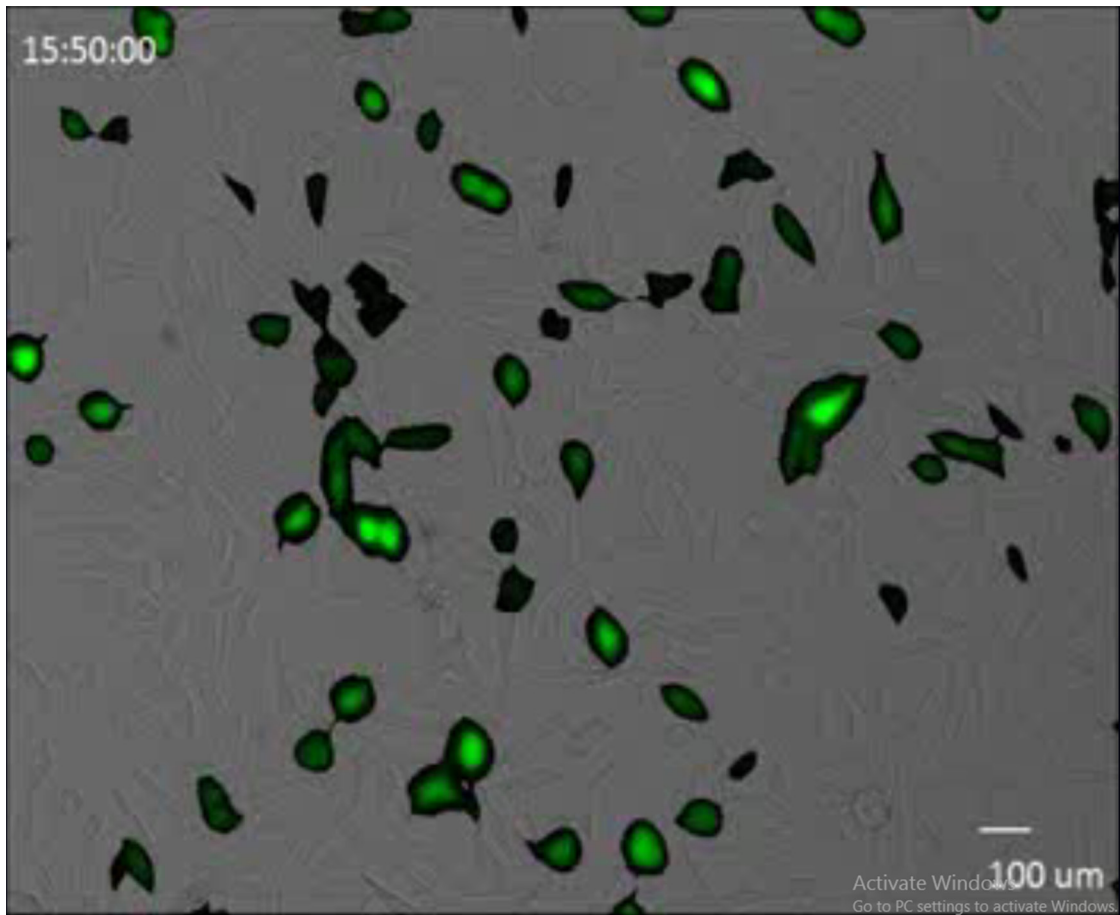

See Supplementary File 3

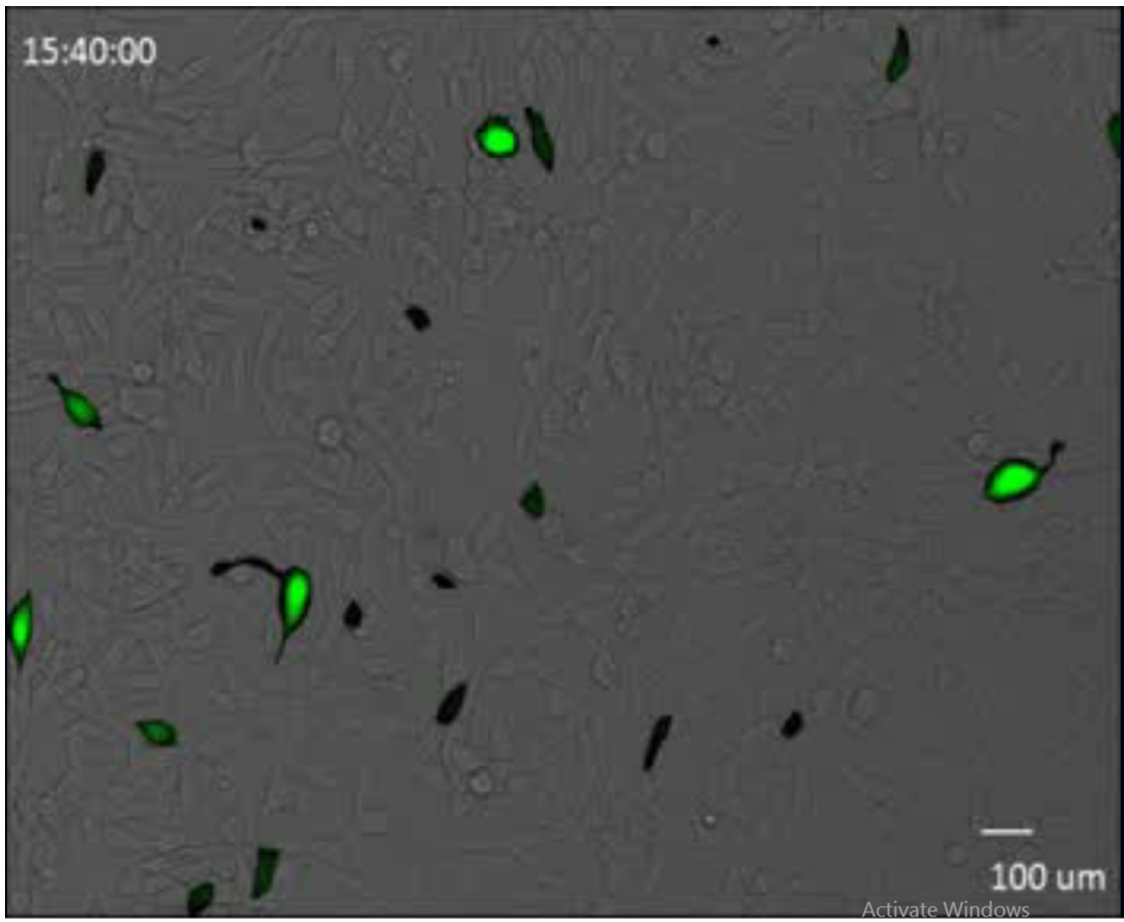

See Supplementary File 4

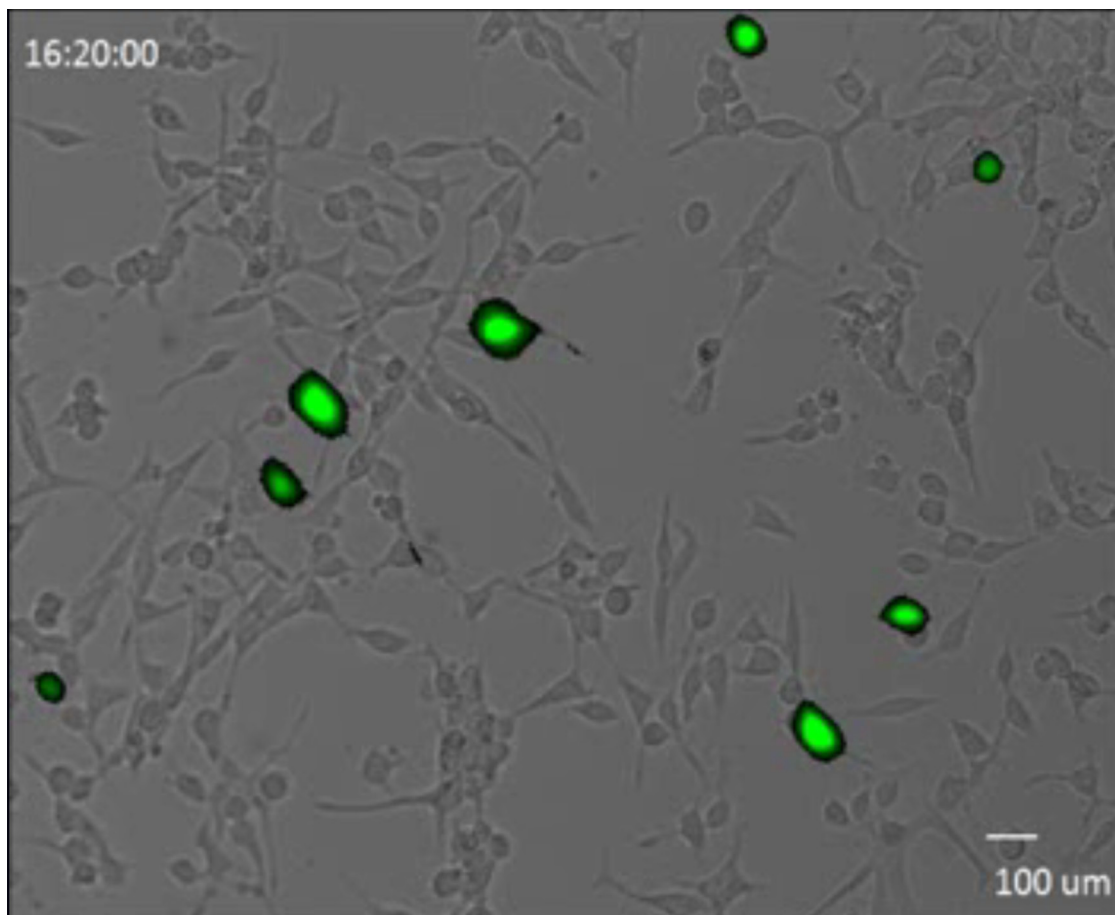

See Supplementary File 5

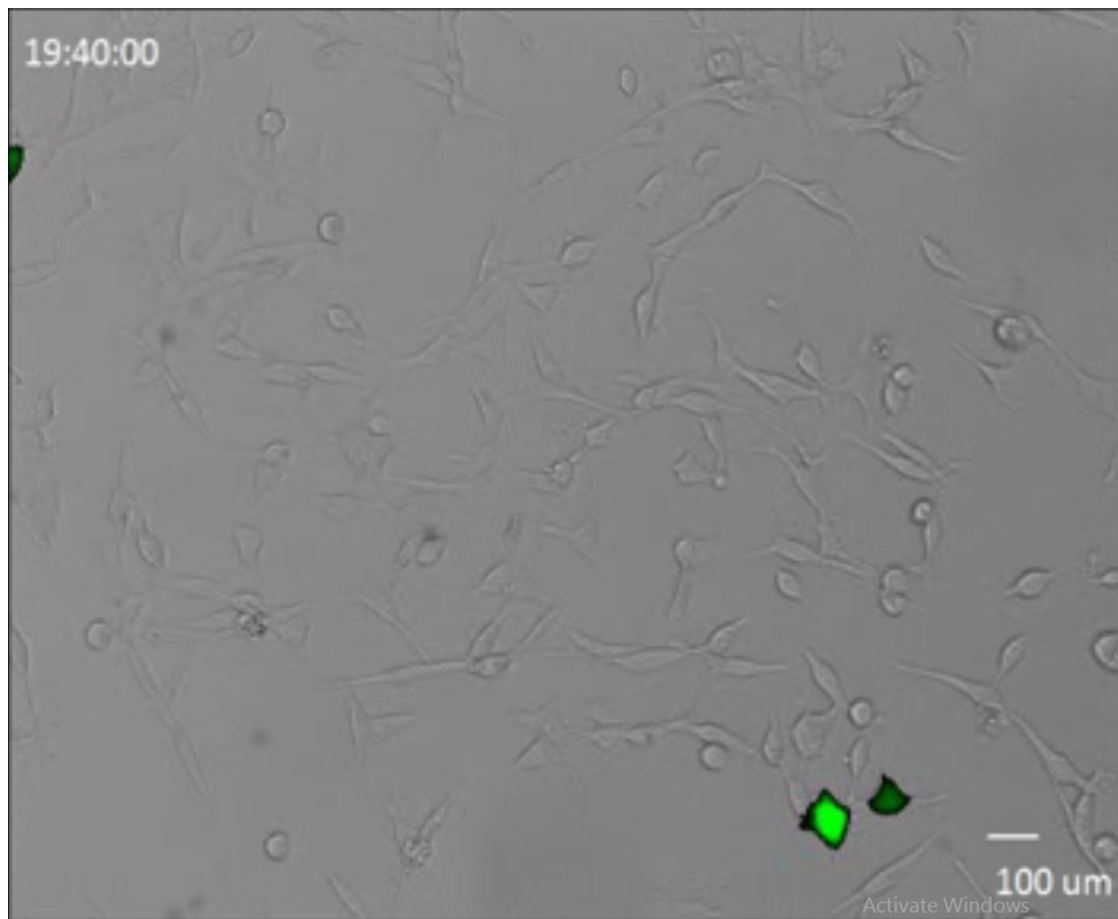

See Supplementary File 6

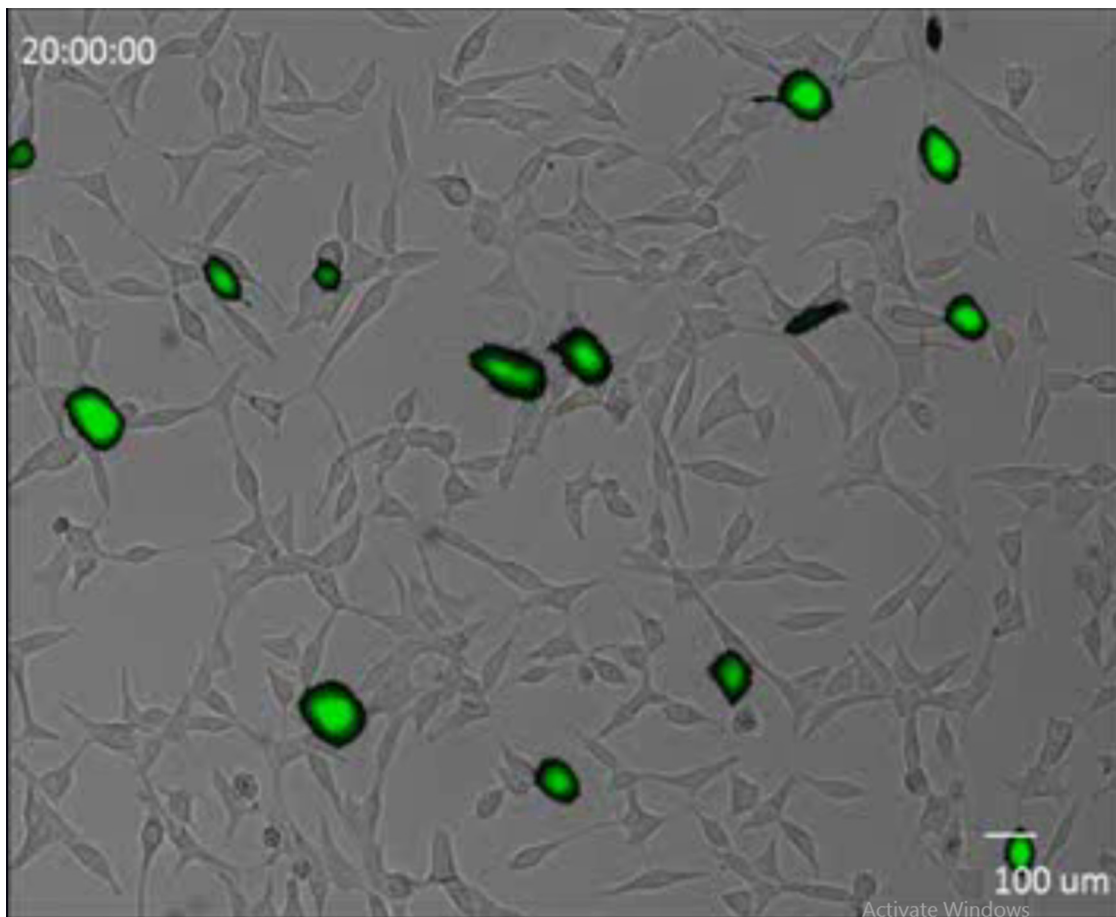

See Supplementary File 7

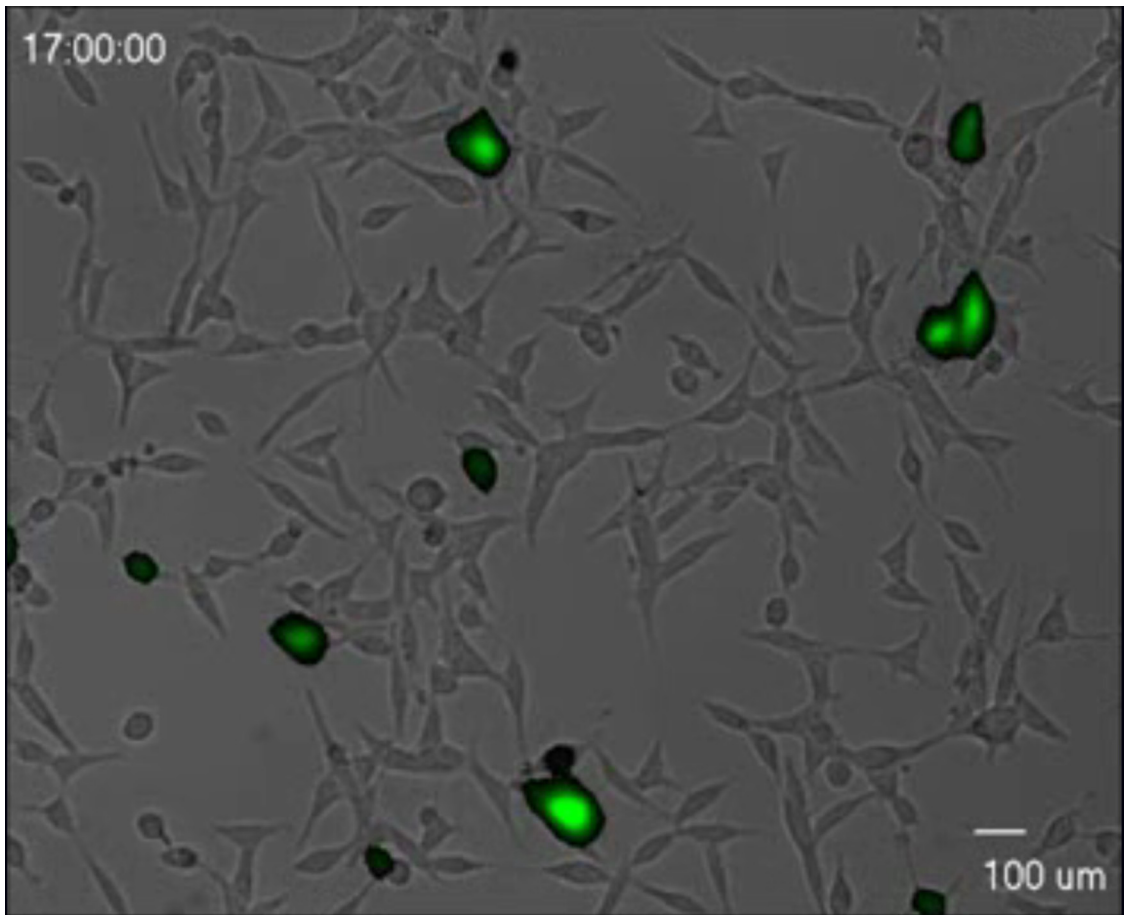

See Supplementary File 8



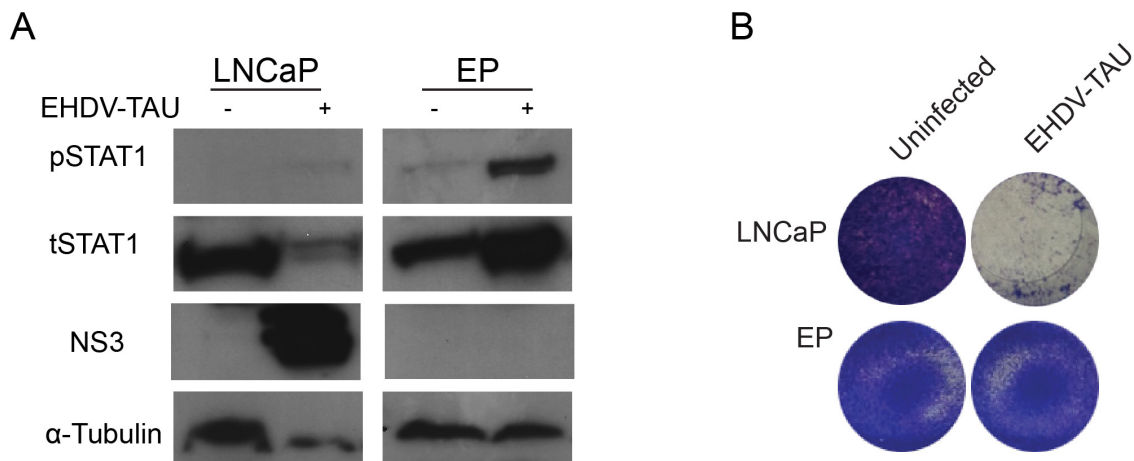

**Supplementary Figure S1: EHDV-TAU infection in EP and LNCaP cells.** **A.** Immunoblot analysis of EHDV-TAU infection of EP and LNCaP cells. Lysates (100  $\mu$ g protein) of EP or LNCaP cells, infected (0.05 pfu/ml, 45 hpi) or not with EHDV-TAU were separated by 10 % SDS-PAGE, blotted on nitrocellulose and probed with antibodies against the indicated proteins (pSTAT1, tSTAT1, NS3 and  $\alpha$ -tubulin). **B.** Crystal violet assessment of EHDV-TAU-induced death of cell cultures. LNCaP and EP cells were plated (70,000 cells/well) in 24 well plates. 24 h post plating, cells were infected with EHDV-TAU (0.05 pfu/ml, 45 h). At 45 hpi cells were fixed and stained with crystal violet. Panel depicts wells of a typical experiment.

**Supplementary Table S1: List of primers used in this study**

See Supplementary File 9

**Supplementary Table S2: List of NFkB target ISGs.** List of NFkB target genes, obtained from <http://www.bu.edu/nf-kb/gene-resources/target-genes/> were crossed with a list of 500 ISGs [43]. The resulting 51 genes are common to both lists

See Supplementary File 10
